## **Title: Hospital Preparedness and Response Framework during infection pandemic**

### **Running title: COVID-19 pandemic**

#### **Author**

Dr. Bikash Bikram Thapa MBBS, MS, MScPH

Nepalese Army Institute of Health Sciences, College of Medicine. Nepal

Email: [bikashbikram.thapa@naihs.edu.np](mailto:bikashbikram.thapa@naihs.edu.np)

#### **Abstract:**

Coronavirus disease 2019 (COVID-19) has put an unprecedented burden to world health, economy and social life with possible long-term consequences. The velocity and mass of this infection pandemic had already overwhelmed every robust health care system in the world. The evidence pertaining to this novel infection pandemic is evolving, so are the challenges in terms of adequate preparedness and response. In this review, we enumerate the strategic and operational domains and build a functional framework for the management of hospital mass infection incidents due to COVID-19 and similar future pandemics. This functional framework could assist health policy maker and health care worker to implement, innovate, and translate preparedness and response to save valuable life and resources.

#### **Keywords:**

Public Health; Infectious Disease; Pandemic; Hospital Management; Health Policy

## **Introduction:**

The world has been hit hard with COVID-19 pandemic causing death in millions.[1] There has been unprecedented strain on health care system due to increase patient volume, increase acuity, special care requirements and resource reduction.[2] COVID-19 has exposed the vulnerability of the current national and global health system and call for novel and coordinated response.[3, 4] Current Pandemic preparedness plan is based on pre-COVID pandemic outbreak response model or the models of mass causality incident. Current COVID-pandemic is beyond pre-defined level (level 6 or level IV) of mass casualty incident. [3, 5]. International organization and several countries have provided documents for hospital preparedness and emergency response frameworks for COVID-19 pandemic, but are not uniform.[6-8] Awareness and preparedness to prevent, detect and respond the pandemic are inconsistent among world countries.[9, 10] According to international health regulation annual report data, out of 182 countries, only 50% have operational readiness capacities in place.[11] The key principles of the pandemic emergency preparedness and response are protection of vulnerable, functionality of the health care system, support to the staff, and treatment of the infected through multi-disciplinary multi-level approach.[12, 13] A cross-sectional survey in 102 emergency departments of 18 European countries documented a lack in early availability of adequate hospital preparedness and response plan.[13, 14] It is necessary that nations and hospitals innovate or translate the policies considering the local resources and capacity.[15, 16] Health care institute require strategical preparedness and response plan as a part of broader 'infectious disease epidemic plan' (IDEP) considering the cases and capacities.[17, 18] This review is aim to outline the framework that form the basis for hospital preparedness and response during hospital mass infection incident caused by COVID-19 pandemic.

## **Materials and Method:**

The web-based (Medline and Google scholar) literature search was done with keywords; hospital preparedness and response in the title, and COVID-19 or SARS-Cov-2 in all fields. The research article retrieved through online search engine (August 2020) were reviewed by the author (October 2020 to April 2021) based on PRISMA protocol (Figure 1). The objective of this review was to identify the 1. Strategic domains 2. Operational activities and 3. Conceptual framework necessary for hospital preparedness and response to mass infection incident in the context of COVID-19 pandemic. The strategic domains were structural elements necessary to conceptualize hospital preparedness and response framework for patient care. Operational domains translates concept and design into action to achieve goals [19]. The hospital preparedness and response framework was designed based on the conceptual theory of “Resilience Framework for Public Health Emergency Preparedness” conceptualized by Khan [20] et al. In this conceptual framework all domains (strategic and functional) were fit together to coordinate effective preparedness and response plan leading into a resilient health system.

Figure 1. PRISMA Protocol for Review:

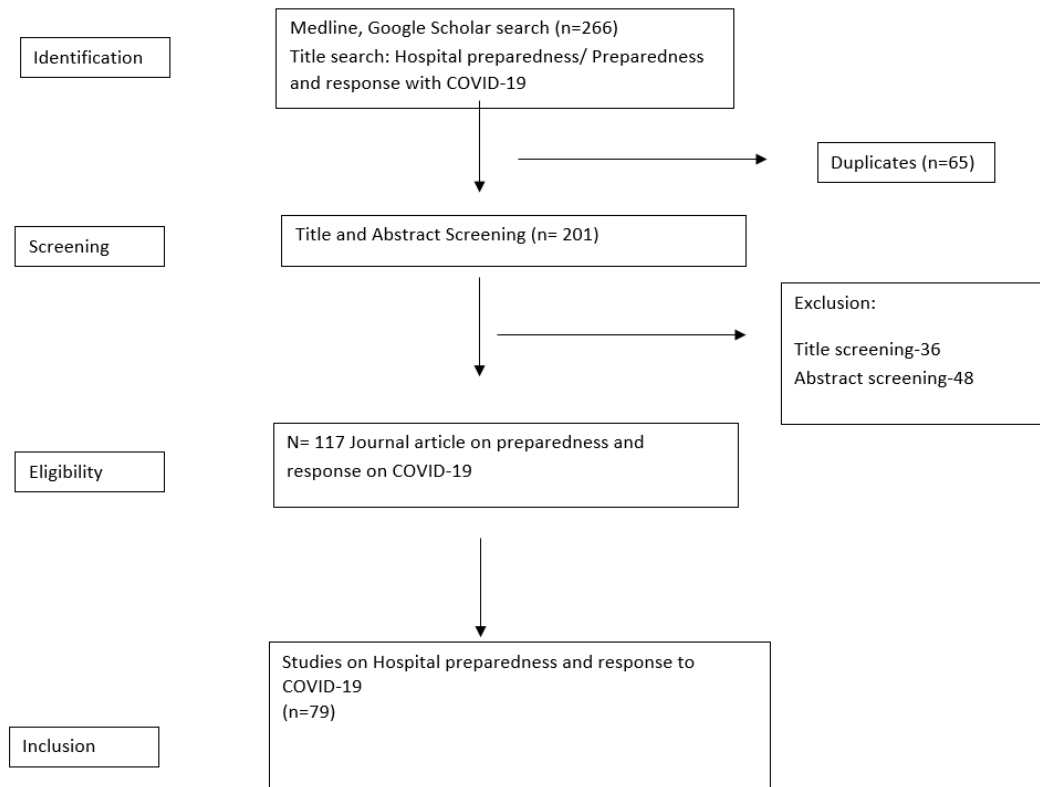

## Result:

The hospital preparedness and response framework with built-in strategic and operational domains of hospital preparedness for infection pandemic is depicted by figure 2. The strategic domain for hospital preparedness for COVID-19 pandemic related mass infection incident were; 1. Leadership 2. Ethics 3. Clinical care 4. Resources 5. Infection prevention and control 6. Data management, which were bonded together in action by effective communication, training and education, and research (Figure 2- hospital preparedness and response framework for infection pandemic). An array of operational activities underscored the successful function of the structural framework. Leadership and governance were the platform for all strategies and operations. The elements of framework were integrated and protected with relevant ethical values and principles. Leadership was emphasized for accountable, transparent, efficient and

effective management of health care system. Resources allocation was most challenging and controversial. Managing strained resources (staff, space and stuff) during pandemic requires surge capability. Quality clinical care, resource optimization, efficient data management, and infection prevention and control strategies, when translated into crisis standard ethical action help in realizing the goal of hospital preparedness and response to mass infection incident.

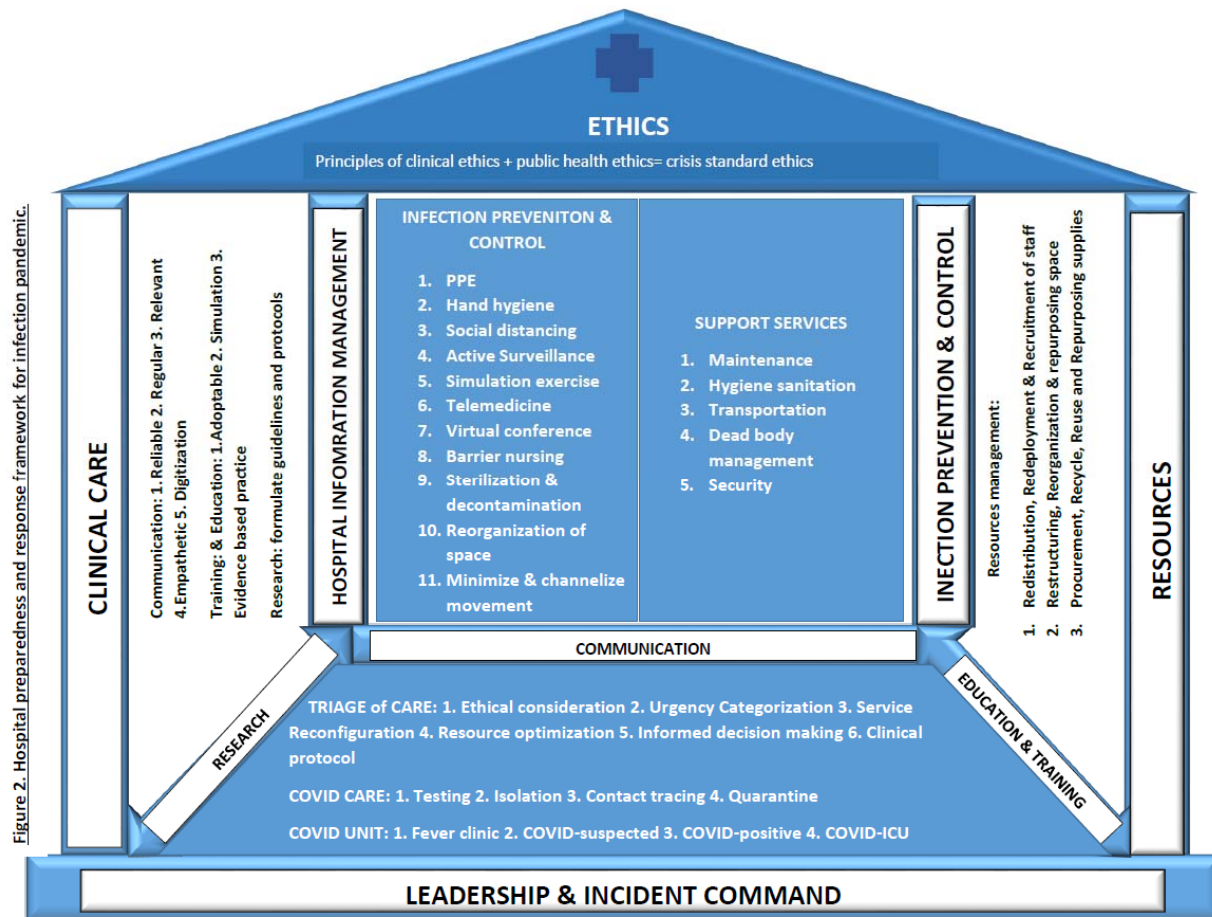

Figure 2. Hospital preparedness and response framework for infection pandemic.

## Discussion:

Preparedness involves decision making to develop strategies to mitigate the health threats from disease outbreaks. The key activities of the policy planning are anticipation, assessment,

prevention, preparation, response and recovery. Evaluation of the context, analysis of the risk, and acknowledgement of the stakeholders and resources is essential to plan hospital preparedness and response measures.[21] Non-uniformity of the context, difference in level of risk and variable stakeholder make hospital preparedness and response framework dynamic and complex. The strategic risk analysis of infection pandemic depends on disease epidemiology and surveillance (incidence, prevalence, and transmissibility), vulnerability (age, comorbidity, socioeconomic determinant of health) surge capacity, and coordination. This provides strategic tool for preparedness and response. [22]

Strategies and operational tools are instrumental to achieve preparedness and response. The resilience of the hospital preparedness framework constructed is based on the interconnections of the elements. The essential elements of the public health emergency preparedness framework conceptualized by Khan et al are; governance and leadership, ethics and values, resources, workforce capacity, communication, surveillance and monitoring, practice and experiences, learning and evaluation, and collaborative networks. The interlinking and the cross-cutting of the elements guaranteed the robustness of the framework. [20]

## **1. Leadership:**

Leadership and planning operationalize and optimize response effort.[2] Formation of central Incident Command Center with multidisciplinary multi-level team leaders is the first step towards hospital preparedness and response to COVID-19.[4, 23] Regular conference and discussion guide real-time solution. Transformational and occasionally authoritative leadership model are successful approach during health emergency. The leadership facilitate as a mentor for

policy initiatives and implementation, through necessary strategies and operational guidelines.[23, 24] Farcas provide a model where hospital incident command is responsible for all sort of hospital activities during pandemic.[4, 7]. A effective command or leadership process through: situation reporting and assessment; problem identification and prioritization; solutions and new assignments; and monitoring and evaluation.[25] The pandemic management requires commitment for shared decision making and effective communication at each level and process.[26]

Physician leaders are at unique position to understand clinical challenge and can legitimately address the issues at strategic, peers and patient level with expertise and skill [27] The five cultural elements of medical leadership are; (1) clear vision, (2) vision aligned objectives, (3) Resource engagement and support, (4) Research, innovation and training, and (5) team work [28, 29] The success of leadership depends upon understanding the situational factors. The task oriented authoritarian style is recommended in emergency or critical environment. Medical emergencies multidisciplinary multilevel job where the chance of un-coordination and contradiction remains high. Overlapping and duplication of strained resources can happen. Leadership moderates willingness to take responsibility and act with maturity and emotional intelligence. Leaders obtain authority from knowledge of situation (internal and external), disease, and the process.[30]

## **2. Ethical Consideration:**

Ethical consideration provide leadership with principles and tools to achieve goals. Resource allocation, care-triage, service reconfiguration, duty to care, information dissemination, and research all need ethical consideration to run effective and efficient health care system during disease pandemic. [31]The four fundamental principles of ethical health care are autonomy, non-

maleficence, beneficence and justice. However, scarcity of resources and cancellation of non-urgent cases conflict with principle of clinical care ethics. Trading infection prevention and control measures, and forced restrictive measures with rising psychological impact and economic consequences necessitates the shift of clinical ethics to public health ethics.[32] Family and public health oriented informed decision making preserve both the individual and public rights for health care during crisis.[33] COVID-19 pandemic should bring social justice, equity, utilitarianism, reciprocity, and solidarity to forefront of health care management.[34-36] During crisis the equality is trade off with benefit. Resources are ethically diverted to save more lives or life years. “Sickest first and youngest first approach” rationalize crisis standard ethics.[37] Ensuring psychological wellbeing, occupational safety, and family care of health care providers ensure value proportionality of their service. The first come first serve, clinical protocol based admission, equity and reciprocity based selection, and clinical score (sequential organ failure assessment-SOFA) all facilitate triage decision during pandemic crisis.[38]

Both clinical and public health care grounded on fundamental ethical values need to operate with clear mechanism of transparency, accountability, effectivity and efficiency.[39] Narration of principle into crisis standard substantive and procedural ethics can legitimate health care activities during COVID-19 pandemic.[40]

### **3. Resources:**

Resources (supplies, space and staff) preparedness is necessary to meet the infection surge in hospital. Surge capacity with efficient and sustainable responses are the key denominators of resilient health care system.[41] Surge capacity is designed to re-activate the health system within 12 hours and sustain it for 2 weeks.[7] Adequate supplies of scarce and expensive medicines, supplies, and life-sustaining equipment requires public-private collaboration, and



solidarity. Reorganization and restructuring of infrastructure; redeployment and recruitment of personnel; redistribution and repurposing of the supplies are key operational activities to meet the increase demand of resource.[7, 42, 43] Resources supplies can be managed with “step-wise escalation” into conventional capacity, contingency capacity, and crisis capacity to maintain supply chain, and work teams.[42, 44] Resource strain and resource burning is rate limiting step of COVID-19 care outcome. A “Brick system” adopted and modified by Indian army medical corps has been a crucial model to manage inventory in health emergency, where bricks of different size is assigned based on different level of COVID care.[45]

Germany adopted COVID-19 rapid response infrastructure (CRR) model to manage rapid escalation to maintain critical care services functionality.[46] COVID-care unit should have dedicated diagnostic and other support units in close proximity; one-way movement of resources and personnel; and negative pressure environment in all involved space.[13] Restructuring should ensure separate donning and doffing area for each COVID-care unit; dedicated resting and refreshment area; satellite pharmacy and supplies.[47] Deferring ‘Blind rehabilitation’ of vulnerable population and admission of the stable COVID patient can surge space. A tertiary care hospital in Italy produce 33% surge in health care provider and reduction of surgical cases to less than 10% through reorganization and service reconfiguration.[13, 23] The hospital support units for maintenance, hygiene and sanitation, transportation, security, and mass fatality management are essential life lines for hospital preparedness and response to COVID crisis. [4, 48]

Redistribution of resources is dynamic process.[49, 50] Internal redeployment and external recruitment can expand human resources. Knowledge and experience based group division and redistribution of health care worker for different working zone adds to resilience and

engagement. Kichhar et al. adopted three division with resident doctors , nursing and supporting staff to serve 8 hour shift and cycle of 9 day rotation in ICU and 15 days rotation in COVID-isolation ward[51] In order to prevent HCW burnout it is advisable to ensure cooling-off time and or “buffer ward” (non-COVID) rotation in between.[47] Minimal risk exposure of vulnerable with maximal use of professional skills is necessary for efficiency and effectiveness of the health care system.[52, 53] Medical students are more suitably posted in screening area or fever clinic. COVID-19 duty shift and staffing ration need to justify the wellbeing of health care provider, the surge capacity, and equity in care.

#### **4. Clinical care:**

The goal of health care center is to mitigate, plan, response and recover, the unexpected burden posed by COVID-19 pandemic. Care of COVID patient is multidisciplinary approach. The clinical care strategic includes treatment of COVID-19 case (from triage to critical care unit), infection control, prevention of nosocomial transmission, and elective/non-COVID case management. [7, 54] The biggest challenge to case management is novelty of the disease.[42] The four pillars of effective patient care are a) testing of suspects, b) Isolation, treatment and referral of confirmed depending upon severity, c) Contact tracing and screening, and d) quarantining of the close contacts.[18, 24, 53]. During pandemic the essential and emergency services need continuity to protect public and personal health.[18, 55, 56] The continuity care of non COVID patient need categorization (low, high, emergency and non-essentials) and service reconfiguration, based on urgency and impact of COVID-19.[41, 56-58]

Algorithm and guidelines rationalize the COVID case management. Anticipation, and preparedness for clinical care ahead of incident had favorable outcomes in hospital and critical care unit.[43, 59-61] Infectious disease society of America (IDSA), The European Centre for

Disease Prevention and Control, and World Health Organization all provide strategies, criteria and technical guideline for testing, isolation, and treatment.[62-65] Sequential organ failure assessment (SOFA) triage protocol was in practice for prioritizing access to critical care during pandemic. SOFA score < 7 is given highest priority and 8-11 with intermediate priority. Score >11 can be either managed medically or palliative care or discharged.[38] Pandemic could cause surge in demand of palliative care preparedness and plan that might necessitates separate surge capability and contingency.[66] Occupational health protection protocol and use of PPE is done according to hazard risk level. Donning and doffing during COVID duty starts with hand hygiene and includes minimum of N95 face mask,/respirator two layers of surgical gloves, head cover, eye/face shields, full sleeve gown, apron and shoe cover[23, 53, 59, 67].

COVID and non-COVID cohort of patient should be managed separately to prevent and control nosocomial transmission of the disease.[47, 58, 68, 69] The diagnosis and triaged is based on epidemiological, clinical, and investigation findings. However, clinical features of the COVID-19 are non-specific and warrant strong association with travel and contact history. The sequence of pre-triage, triage, diagnostics, staging and definitive care are important to streamline the process and resources.[13, 69] COVID-care center requires Fever clinic, COVID-suspected ward, COVID-isolation ward, and COVID-critical care unit with robust laboratory and imaging facilities. RT-PCR test is highly specific test but the accuracy is yet to be evaluated in systematic analysis (false negative result as high as 40%). [70, 71] Pharmacotherapy and other therapeutics need careful selection based on evolving evidences and cost effectiveness. Most of the trials related to Hydroxychloroquine including “SOLIDARITY” trial was terminated owing to the lack of clinical benefit.[72] In comparison to placebo Remdesivir reduced time to clinical improvement (Hazard ratio for improvement is 1.23).[73] Dexamethasone had shown reduction

in 28 day mortality in hospitalized patient when compared to usual care.[74] Attending health care provider requires “point care skill” (ultrasound, echocardiography etc) in ward and ICU.[47] Respiratory and hemodynamic support is crucial. Out of 72314 COVID-19 confirmed cases, Wu reported mild, severe and critical disease in 81, % 14% and 5% respectively with overall mortality of 2.3%. 19% of these patients had hypoxic respiratory failure who need invasive or noninvasive ventilation.[65, 75] Critical and informed decision making is necessary to justify limited scientific evidences and scarce resource (personal protective equipment, respiratory support and infection control means) utilization in mass critical care scenario.[57, 76] It is argued that a single consent mentioning all possible procedure at the time of admission avoid unnecessary conflicts and contacts.[47]

## **5. Infection prevention and Control.**

“Swiss cheese model” that provide multiple layers of defenses in prevention and control of infection is a safe hospital strategies.[77] A triple check system; help desk, screening desk and emergency evaluation desk are deemed necessary.[51] Hand hygiene, social distancing, and face mask were underscored as universal precautions for infection prevention and control (IPC). Personal protective equipment are recommended according to the risk of exposure in different level of work station (biosafety level). [53, 57] 48% IPC professionals reported shortage of PPE in a multinational survey study. It was as high as 64% in low income countries.[78] Strict precaution is recommended in area with high chance of aerosol producing procedures that includes sample collection, nebulization and intubation. Simulation based training effective means to make HCW conversant to new environment as well as for IPC. [79-81] Multimedia display regarding precautions and standard operating procedures reinforce preparedness and response.[47] Time spent with COVID-19 suspected and confirmed cases can be minimized

using video-surveillance, in-room phones, and virtual visitors.[7] HCW visit to COVID-19 care unit should have time and frequency count per day depending upon the available human resources. Disposable unit of personal supplies and consumables are encouraged. All administrative, educational and clinical meetings when limited to virtual conference maintain social distancing for IPC. Emergency department, hospital wards, Operation Theater and Intervention center need rapid transformation in line with segregated and barrier treatment/surgery for any suspected or confirmed cases of COVID-19.[23, 47] Movement of resources, and COVID and non-COVID patient should not cross paths. Clear visual and spatial separation of care areas maintain barrier to exposure and spread.[23] Precaution in operation theatre includes proper decontamination, disinfection and sterilization of equipment and instruments[82]; undertaking surgeries based on newly adopted COVID-pandemic guidelines; and judicious application of surgical techniques and equipment.[56] Institutional policy, installation of IPC facilities, knowledge, active screening and surveillance, and response all are key elements of infection prevention and control.[18, 24]. The reported rate of infection transmission to HCW ranges from 0-0.001% in India [47, 51], and 7-18% in Europe [83]. Mandatory screening of all visitors, visitor log, and maintain health care worker's contact diary helps in disease surveillance. It is duty of system to equip and reciprocate health care workers for better response to pandemic. Self-reporting, surveillance, chemoprophylaxis, sanitation and isolation are measures of occupation health protection. [47]

## **5. Information Technology (Infotech):**

The information management system and technology has multiple purpose including: secure and quality data management; effective communication; increase accessibility to health care; improved disease diagnosis and treatment. [84, 85] Electronic tools and data base provide

evidence based preparedness and response to COVID-19 pandemic by early alert, case detection, contact tracing and follow up. World Health Organization has been a strategic partner to provide platform for digital tools.[86]The InfoTech and “infodemics” in COVID era is maintaining health and health care delivery. Digital media has been widely approved at national and regional level to provide updated resources, guidelines, education and awareness. It creates smooth functioning of the interconnected elements of the hospital preparedness and response. E-learning, telemedicine, tele-conferencing are viable alternatives for response activities. Pandemic related spatial and temporal data are widely available through interactive policy informatics platform and research repositories.[87]

## **6. Information and Education:**

Information is organized data or knowledge that provides a basis for decision making. Information is best resources available at hospitals.[88]Hospital information management system is a link between logistics and operations for effective health outcome. The channels should be reliable, regular, and relevant.[41] A focal person in incident command chain serve the purpose. Information sharing and clinical decision making need evidence based, empathetic, respectful and humanitarian approach.[89] Digital technology is not only the vital source of evidence based medical practice but also a smart means of active disease surveillance.[85, 87] Information sharing pertaining to reorganization of hospital services, infection control strategies, visitor’s movement restriction, family-informed decision making, clinical guidelines and protocols should be clearly communicated to all responsible stakeholders (in patient care).[41, 90] Education and training promote adaptability for emergency response and prepare for unknown future. Cycle of learning and evaluation foster improvements and innovation for better preparedness that are locally applicable and affordable.[20] Continue medical education and regular training is

necessary to enhance evidence based health care during pandemic. Simulation based exercise has been proven effective for preparedness and response to novel pandemic. The “plan-do-study-act cycle” is a valuable process of simulation to adopt new challenges.[81, 91]

## **7. Communication**

Communication is a strategy to network components of hospital preparedness framework by delivering clear and consistent message. The aim of robust communication is to influence health related behavioral change, promote cohesiveness in networking, and to promote professionalism in health care. Communication thrive in relationship, feedback, and collaboration.[20] Honest and effective communication of crisis and risk of pandemic builds trust, and credibility. Atuguba argue that effective communication is the essential social determinants of the mental and physical health in COVID-19 pandemic. [92] The key messages should be communicated timely, and reviewed regularly. Effective team work and communication is responsible for lowering hospitalization and costs; improve efficiencies; enhance service user satisfaction; increase staff motivation , productivity and innovation; reduce medical error and overall morbidity and mortality[93] Conversations require empathetic listening and responsive action to address the loss and grief. Conveying lack of resources, critical medical condition, death of patient require humanistic approach.[94]

## **8. Research**

The medical practice and protocols are rapidly being reconfigured in order to generate knowledge to provide best of medical care. Research provide ethical approach for duty to care, duty to safeguard, and duty to guide the health care. Conducting medical research itself demands

highest ethical and safety standards. Institutional and national health research governing body have crucial role to play.[95]Ethics for clinical trials is under scrutiny. There is growing argument to preserve rights of a research subject during randomized trials.[96] Research and trials must be informed by equitable access to innovation. Social and behavioral science researches are valuable to explore the impact of pandemic. Scientific research is the basis for present and future infection pandemic policy, preparedness and response. [97]

### **Conclusion:**

The COVID-19 and its consequences are still evolving. This review provides comprehensive frameworks and principles towards hospital preparedness in wake of COVID-19 pandemic. Medical leadership, ethics in health care, resource optimization, quality clinical care, infection control and, information technology are the building blocks of hospital preparedness framework. The emerging scientific evidence will help to map the policy and strategy accordingly. The past experience with pandemic and disaster response need to be translated into more effective and efficient universal model to manage hospital mass infection incident. A single model might not be adoptable for all. The strategy to address the inequitable health care system across the world need further research and evaluation. COVID-19 pandemic and the mass infection incident is beyond any measureable scale. The global pandemic calls for global preparedness and response. The model presented in this review will supply policy maker a basis for adoptable and sustainable hospital preparedness plan to save lives, life years and optimize resources. Emergencies and crisis are unpredictable; better be prepared than perish.

### **Declarations**



Source of funding: none

Conflict of interest: none

Acknowledgement: none

## References:

1. World Health Organization. Coronavirus disease (COVID-2019) situation reports. 2020; Available from: <https://www.who.int/emergencies/diseases/novel-coronavirus-2019/situation-reports>. Accessed on September 01, 2020.
2. Anesi GL, Lynch Y, Evans L. A Conceptual and Adaptable Approach to Hospital Preparedness for Acute Surge Events Due to Emerging Infectious Diseases. *Crit Care Explor*. 2020 Apr;2(4):e01110.<http://dx.doi.org/10.1097/CCE.0000000000000110>.
3. Coccolini F, Sartelli M, Kluger Y, Pikoulis E, Karamagioli E, Moore EE, et al. COVID-19 the showdown for mass casualty preparedness and management: the Cassandra Syndrome. *World J Emerg Surg*. 2020 Apr 9;15(1):26.<http://dx.doi.org/10.1186/s13017-020-00304-5>.
4. Farcas A, Ko J, Chan J, Malik S, Nono L, Chiampas G. Use of Incident Command System for Disaster Preparedness: A Model for an Emergency Department COVID-19 Response. *Disaster Med Public Health Prep*. 2020 Jun 24:1-6.<http://dx.doi.org/10.1017/dmp.2020.210>.
5. Iskander J, Strikas RA, Gensheimer KF, Cox NJ, Redd SC. Pandemic influenza planning, United States, 1978-2008. *Emerg Infect Dis*. 2013 Jun;19(6):879-85.<http://dx.doi.org/10.3201/eid1906.121478>.
6. WHO-Europe. Hospital emergency response checklist Denmark: WHO Regional Office for Europe; 2020; Available from: [https://www.euro.who.int/data/assets/pdf\\_file/0020/148214/e95978.pdf?ua=1](https://www.euro.who.int/data/assets/pdf_file/0020/148214/e95978.pdf?ua=1). Accessed on September 1, 2020
7. Wurmb T, Scholtes K, Kolibay F, Schorscher N, Ertl G, Ernestus RI, et al. Hospital preparedness for mass critical care during SARS-CoV-2 pandemic. *Crit Care*. 2020 Jun 30;24(1):386.<http://dx.doi.org/10.1186/s13054-020-03104-0>.
8. Kidd MR. Five principles for pandemic preparedness: lessons from the Australian COVID-19 primary care response. *Br J Gen Pract*. 2020 Jul;70(696):316-7.<http://dx.doi.org/10.3399/bjgp20X710765>.
9. Shrestha GS, Paneru HR, Acharya SP, Shrestha SK, Sigdel MR, Tiwari S, et al. Preparedness for Coronavirus Disease in Hospitals of Nepal: A Nationwide Survey. *JNMA J Nepal Med Assoc*. 2020 Apr 30;58(224):248-51.<http://dx.doi.org/10.31729/jnma.4941>.
10. Elhadi M, Msherghi A, Alkeelani M, Zorgani A, Zaid A, Alsuyihili A, et al. Assessment of Healthcare Workers' Levels of Preparedness and Awareness Regarding COVID-19 Infection in Low-Resource Settings. *Am J Trop Med Hyg*. 2020 Aug;103(2):828-33.<http://dx.doi.org/10.4269/ajtmh.20-0330>.

11. Kandel N, Chungong S, Omaar A, Xing J. Health security capacities in the context of COVID-19 outbreak: an analysis of International Health Regulations annual report data from 182 countries. *Lancet*. 2020 Mar 28;395(10229):1047-53.[http://dx.doi.org/S0140-6736\(20\)30553-5](http://dx.doi.org/S0140-6736(20)30553-5).
12. Kidd M. Australia's primary care COVID-19 response. *Aust J Gen Pract*. 2020 Apr 2;49.<http://dx.doi.org/10.31128/AJGP-COVID-02>.
13. Carezzo L, Costantini E, Greco M, Barra FL, Rendiniello V, Mainetti M, et al. Hospital surge capacity in a tertiary emergency referral centre during the COVID-19 outbreak in Italy. *Anaesthesia*. 2020 Jul;75(7):928-34.<http://dx.doi.org/10.1111/anae.15072>.
14. Bressan S, Buonsenso D, Farrugia R, Parri N, Oostenbrink R, Titomanlio L, et al. Preparedness and response to Pediatric CoVID-19 in European Emergency Departments: a survey of the REPEM and PERUKI networks. *Ann Emerg Med*. 2020 May 15.<http://dx.doi.org/10.1016/j.annemergmed.2020.05.018>.
15. Arora V, Evans C, Langdale L, Lee A. You Need a Plan: A Stepwise Protocol for Operating Room Preparedness During an Infectious Pandemic. *Fed Pract*. 2020 May;37(5):212-8.
16. Cao Y, Shan J, Gong Z, Kuang J, Gao Y. Status and Challenges of Public Health Emergency Management in China Related to COVID-19. *Front Public Health*. 2020;8:250.<http://dx.doi.org/10.3389/fpubh.2020.00250>.
17. Fatiregun AA, Isere EE. Epidemic preparedness and management: A guide on Lassa fever outbreak preparedness plan. *Niger Med J*. 2017 Jan-Feb;58(1):1-6.<http://dx.doi.org/10.4103/0300-1652.218414>.
18. Kim T, Choi MJ, Kim SB, Kim JY, Lee J, Oh HS, et al. Strategical Preparedness and Response Actions in the Healthcare System Against Coronavirus Disease 2019 according to Transmission Scenario in Korea. *Infect Chemother*. 2020 Jul 22.<http://dx.doi.org/52.e45> [pii].
19. Gholam G A, Mehrpourb M, A N. Organizational Structure Procedia - Social and Behavioral Sciences 2016;230:455-62.<http://dx.doi.org/10.1016/j.sbspro.2016.09.057>.
20. Khan Y, O'Sullivan T, Brown A, Tracey S, Gibson J, Genereux M, et al. Public health emergency preparedness: a framework to promote resilience. *BMC Public Health*. 2018 Dec 5;18(1):1344.<http://dx.doi.org/10.1186/s12889-018-6250-7>.
21. NHS. NHS Commissioning Board Emergency Preparedness Framework 2013 [september 10,2020]; Available from: <http://www.haltonccg.nhs.uk/staff-documents/Corporate%20Documents/EPRR%20Framework%20March%202013.pdf>. Accessed on September 06, 2020.
22. Ario AR, Makumbi I, Bulage L, Kyazze S, Kayiwa J, Wetaka MM, et al. The logic model for Uganda's health sector preparedness for public health threats and emergencies. *Glob Health Action*. 2019;12(1):1664103.<http://dx.doi.org/10.1080/16549716.2019.1664103>.
23. Gupta S, Federman DG. Hospital preparedness for COVID-19 pandemic: experience from department of medicine at Veterans Affairs Connecticut Healthcare System. *Postgrad Med*. 2020 May 12:1-6.<http://dx.doi.org/10.1080/00325481.2020.1761668>.
24. Raina SK, Kumar R, Galwankar S, Garg S, Bhatt R, Dhariwal AC, et al. Are we prepared? Lessons from Covid-19 and OMAG position paper on epidemic preparedness. *J Family Med Prim Care*. 2020 May;9(5):2161-6.[http://dx.doi.org/10.4103/jfmpc.jfmpc\\_384\\_20](http://dx.doi.org/10.4103/jfmpc.jfmpc_384_20).
25. O'Neill PA. The ABC's of disaster response. *Scand J Surg*. 2005;94(4):259-66.<http://dx.doi.org/10.1177/145749690509400403>.

26. Peiffer-Smadja N, Lucet JC, Bendjelloul G, Bouadma L, Gerard S, Choquet C, et al. Challenges and issues about organizing a hospital to respond to the COVID-19 outbreak: experience from a French reference centre. *Clin Microbiol Infect*. 2020 Jun;26(6):669-72.<http://dx.doi.org/10.1016/j.cmi.2020.04.002>.
27. Sarto F, Veronesi G. Clinical leadership and hospital performance: assessing the evidence base. *BMC Health Serv Res*. 2016 May 24;16 Suppl 2:169.<http://dx.doi.org/10.1186/s12913-016-1395-5>.
28. Dixon-Woods M, Baker R, Charles K, Dawson J, Jerzembek G, Martin G, et al. Culture and behaviour in the English National Health Service: overview of lessons from a large multimethod study. *BMJ Qual Saf*. 2014 Feb;23(2):106-15.<http://dx.doi.org/10.1136/bmjqs-2013-001947>.
29. West M, Armit K, Eckert R, West T, A. L. Leadership and Leadership Development in Health Care: The Evidence Base. Faculty of Medical Leadership and Management. The King's Fund; 2015; Available from: [https://www.kingsfund.org.uk/sites/default/files/field/field\\_publication\\_file/leadership-leadership-development-health-care-feb-2015.pdf](https://www.kingsfund.org.uk/sites/default/files/field/field_publication_file/leadership-leadership-development-health-care-feb-2015.pdf).
30. Iserson KV. Critical leadership. *J Emerg Med*. 1986;4(4):335-40.[http://dx.doi.org/0736-4679\(86\)90016-8](http://dx.doi.org/0736-4679(86)90016-8).
31. Biddison LD, Berkowitz KA, Courtney B, De Jong CM, Devereaux AV, Kisson N, et al. Ethical considerations: care of the critically ill and injured during pandemics and disasters: CHEST consensus statement. *Chest*. 2014 Oct;146(4 Suppl):e145S-55S.<http://dx.doi.org/10.1378/chest.14-0742>.
32. Chew C, Ko D. Medical ethics in the era of COVID-19: Now and the future. *Respirology*. 2020 Aug 5.<http://dx.doi.org/10.1111/resp.13927>.
33. Kim OJ. Ethical Perspectives on the Middle East Respiratory Syndrome Coronavirus Epidemic in Korea. *J Prev Med Public Health*. 2016 Jan;49(1):18-22.<http://dx.doi.org/10.3961/jpmph.16.013>.
34. Kim SYH, Grady C. Ethics in the time of COVID: What remains the same and what is different. *Neurology*. 2020 Apr 6.<http://dx.doi.org/10.1212/WNL.0000000000009520>.
35. Gostin LO, Friedman EA, Wetter SA. Responding to Covid-19: How to Navigate a Public Health Emergency Legally and Ethically. *Hastings Cent Rep*. 2020 Mar;50(2):8-12.<http://dx.doi.org/10.1002/hast.1090>.
36. Australian Government DoH. Australian Health Sector Emergency Response Plan for Novel Coronavirus (COVID-19). 2020 07/02/2020. Available from: <https://www.health.gov.au/news/health-alerts/novel-coronavirus-2019-ncov-health-alert>. Accessed on August 25, 2020.
37. Emanuel EJ, Persad G, Upshur R, Thome B, Parker M, Glickman A, et al. Fair Allocation of Scarce Medical Resources in the Time of Covid-19. *N Engl J Med*. 2020 Mar 23.<http://dx.doi.org/10.1056/NEJMs2005114>.

38. Christian MD, Hawryluck L, Wax RS, Cook T, Lazar NM, Herridge MS, et al. Development of a triage protocol for critical care during an influenza pandemic. *CMAJ*. 2006 Nov 21;175(11):1377-81.<http://dx.doi.org/10.1503/cmaj.060911>.
39. DeBruin D, Leider JP. COVID-19: The Shift From Clinical to Public Health Ethics. *J Public Health Manag Pract*. 2020 Jul/Aug;26(4):306-9.<http://dx.doi.org/10.1097/PHH.0000000000001204>.
40. Hodge JG, Jr., Hanfling D, Powell TP. Practical, ethical, and legal challenges underlying crisis standards of care. *J Law Med Ethics*. 2013 Mar;41 Suppl 1:50-5.<http://dx.doi.org/10.1111/jlme.12039>.
41. Adelaja I, Sayma M, Walton H, McLachlan G, de Boisanger J, Bartlett-Pestell S, et al. A comprehensive hospital agile preparedness (CHAPs) tool for pandemic preparedness, based on the COVID-19 experience. *Future Healthc J*. 2020 Jun;7(2):165-8.<http://dx.doi.org/10.7861/fhj.2020-0030>.
42. Xie J, Tong Z, Guan X, Du B, Qiu H, Slutsky AS. Critical care crisis and some recommendations during the COVID-19 epidemic in China. *Intensive Care Med*. 2020 May;46(5):837-40.<http://dx.doi.org/10.1007/s00134-020-05979-7>.
43. Primmaz S, Le Terrier C, Suh N, Ventura F, Boroli F, Bendjelid K, et al. Preparedness and Reorganization of Care for Coronavirus Disease 2019 Patients in a Swiss ICU: Characteristics and Outcomes of 129 Patients. *Crit Care Explor*. 2020 Aug;2(8):e0173.<http://dx.doi.org/10.1097/CCE.0000000000000173>.
44. Center of disease control C. Strategies for Optimizing the Supply of Facemasks. 2020.
45. Kumar P, Killedar M, Singh G. Adaptation of the 'Assembly Line' and 'Brick System' techniques for hospital resource management of personal protective equipment, as preparedness for mitigating the impact of the COVID-19 pandemic in a large public hospital in India. *J Hosp Infect*. 2020 Aug;105(4):787-9.<http://dx.doi.org/10.1016/j.jhin.2020.05.029>.
46. Augustin M, Schommers P, Suarez I, Koehler P, Gruell H, Klein F, et al. Rapid response infrastructure for pandemic preparedness in a tertiary care hospital: lessons learned from the COVID-19 outbreak in Cologne, Germany, February to March 2020. *Euro Surveill*. 2020 May;25(21).<http://dx.doi.org/10.2807/1560-7917.ES.2020.25.21.2000531>.
47. Jog S, Kelkar D, Bhat M, Patwardhan S, Godavarthy P, Dhundi U, et al. Preparedness of Acute Care Facility and a Hospital for COVID-19 Pandemic: What We Did! *Indian J Crit Care Med*. 2020 Jun;24(6):385-92.<http://dx.doi.org/10.5005/jp-journals-10071-23416>.
48. Kumar A, Nayar KR. COVID-19 and Mass Fatality Management: A Public Health Challenge. *Disaster Med Public Health Prep*. 2020 Jul 27:1-4.<http://dx.doi.org/10.1017/dmp.2020.277>.
49. Li L, Xv Q, Yan J. COVID-19: the need for continuous medical education and training. *Lancet Respir Med*. 2020 Apr;8(4):e23.[http://dx.doi.org/S2213-2600\(20\)30125-9](http://dx.doi.org/S2213-2600(20)30125-9).
50. England. N. Redeploying your secondary care medical workforce safely. NHS, England; 2020; Available from: [www.england.nhs.uk/coronavirus/publication/redeploying-your-secondary-care-medical-workforce-safely/](http://www.england.nhs.uk/coronavirus/publication/redeploying-your-secondary-care-medical-workforce-safely/). Accessed on September 09 2020.

51. Khichar S, Midha N, Bohra GK, Kumar D, Gopalakrishanan M, Kumar B, et al. Healthcare Resource Management and Pandemic Preparedness for COVID-19: A Single Centre Experience From Jodhpur, India. *Int J Health Policy Manag.* 2020 Jun 20.<http://dx.doi.org/10.34172/ijhpm.2020.102>.
52. Brooke J, Jackson D. Older people and COVID-19: Isolation, risk and ageism. *J Clin Nurs.* 2020 Jul;29(13-14):2044-6.<http://dx.doi.org/10.1111/jocn.15274>.
53. Christopher DJ, Isaac BT, Rupali P, Thangakunam B. Health-care preparedness and health-care worker protection in COVID-19 pandemic. *Lung India.* 2020 May-Jun;37(3):238-45.[http://dx.doi.org/10.4103/lungindia.lungindia\\_189\\_20](http://dx.doi.org/10.4103/lungindia.lungindia_189_20).
54. Kazzaz YM, Alkhalaf H, Alharbi M, Al Shaalan M, Almuneef M, Alshehri A, et al. Hospital preparedness and management of pediatric population during COVID-19 outbreak. *Ann Thorac Med.* 2020 Jul-Sep;15(3):107-17.[http://dx.doi.org/10.4103/atm.ATM\\_212\\_20](http://dx.doi.org/10.4103/atm.ATM_212_20).
55. WHO. Maintaining essential health services: operational guidance for the COVID-19 context. 2020; Available from: <https://www.who.int/publications/i/item/covid-19-operational-guidance-for-maintaining-essential-health-services-during-an-outbreak>. Accessed on September 09,2020.
56. Ademuyiwa AO, Bekele A, Berhea AB, Borgstein E, Capo-Chichi N, Derbew M, et al. COVID-19 Preparedness Within the Surgical, Obstetric, and Anesthetic Ecosystem in Sub-Saharan Africa. *Ann Surg.* 2020 Jul;272(1):e9-e13.<http://dx.doi.org/10.1097/SLA.0000000000003964>.
57. Flemming S, Hankir M, Ernestus RI, Seyfried F, Germer CT, Meybohm P, et al. Surgery in times of COVID-19-recommendations for hospital and patient management. *Langenbecks Arch Surg.* 2020 May;405(3):359-64.<http://dx.doi.org/10.1007/s00423-020-01888-x>.
58. Center of disease control C. 2020; Available from: <https://www.cdc.gov/coronavirus/2019-ncov/hcp/ppe-strategy/face-masks.html>; Accessed on September 08, 2020.
59. Goh KJ, Wong J, Tien JC, Ng SY, Duu Wen S, Phua GC, et al. Preparing your intensive care unit for the COVID-19 pandemic: practical considerations and strategies. *Crit Care.* 2020 May 11;24(1):215.<http://dx.doi.org/10.1186/s13054-020-02916-4>.
60. Gomersall CD, Loo S, Joynt GM, Taylor BL. Pandemic preparedness. *Curr Opin Crit Care.* 2007 Dec;13(6):742-7.<http://dx.doi.org/10.1097/MCC.0b013e3282f1bafd>.
61. Griffin KM, Karas MG, Ivascu NS, Lief L. Hospital Preparedness for COVID-19: A Practical Guide from a Critical Care Perspective. *Am J Respir Crit Care Med.* 2020 Jun 1;201(11):1337-44.<http://dx.doi.org/10.1164/rccm.202004-1037CP>.
62. WHO. Country & Technical Guidance - Coronavirus disease (COVID-19); Available from: <https://www.who.int/emergencies/diseases/novel-coronavirus-2019/technical-guidance-publications>. Accessed on September 08, 2020.
63. America IDSo. COVID-19 Prioritization of Diagnostic Testing ; Available from: <https://www.idsociety.org/globalassets/idsa/public-health/covid-19-prioritization-of-dx-testing.pdf>. Accessed on September 08, 2020.
64. European center of disease prevention and control e. Testing strategies for SARS-CoV-2. 2020; Available from: <https://www.ecdc.europa.eu/en/covid-19/surveillance/testing-strategies>. Accessed on September 08, 2020

65. Wu Z, McGoogan JM. Characteristics of and Important Lessons From the Coronavirus Disease 2019 (COVID-19) Outbreak in China: Summary of a Report of 72314 Cases From the Chinese Center for Disease Control and Prevention. *JAMA*. 2020 Feb 24.<http://dx.doi.org/10.1001/jama.2020.2648>.
66. Downar J, Seccareccia D. Palliating a pandemic: "all patients must be cared for". *J Pain Symptom Manage*. 2010 Feb;39(2):291-5.<http://dx.doi.org/10.1016/j.jpainsymman.2009.11.241>.
67. Ezenwa BN, Fajolu IB, Akinajo OR, Makwe CC, Oluwole AA, Akase IE, et al. Management of covid-19: a practical guideline for maternal and newborn health care providers in Sub-Saharan Africa. *J Matern Fetal Neonatal Med*. 2020 May 18:1-7.<http://dx.doi.org/10.1080/14767058.2020.1763948>.
68. Robert Koch Institute R. 2020. Available from: [https://www.rki.de/EN/Home/homepage\\_node.html](https://www.rki.de/EN/Home/homepage_node.html). Accessed on September 02,2020.
69. Afzal B, Ali N, Mian A. Emergency Preparedness and Response to the COVID-19 Pandemic: Our Experience from the Emergency Department of a Tertiary Care Hospital in Pakistan. *J Coll Physicians Surg Pak*. 2020 Jun;30(6):72-3.<http://dx.doi.org/10.29271/jcpsp.2020.Supp1.S72>.
70. Patel A, Jernigan DB. Initial Public Health Response and Interim Clinical Guidance for the 2019 Novel Coronavirus Outbreak - United States, December 31, 2019-February 4, 2020. *MMWR Morb Mortal Wkly Rep*. 2020 Feb 7;69(5):140-6.<http://dx.doi.org/10.15585/mmwr.mm6905e1>.
71. Lieberman JA, Pepper G, Naccache SN, Huang ML, Jerome KR, Greninger AL. Comparison of Commercially Available and Laboratory-Developed Assays for In Vitro Detection of SARS-CoV-2 in Clinical Laboratories. *J Clin Microbiol*. 2020 Jul 23;58(8).<http://dx.doi.org/10.1128/JCM.00821-20>
72. WHO. "Solidarity" clinical trial for COVID-19 treatments: Update on hydroxychloroquine. ; Available from: <https://www.who.int/emergencies/diseases/novel-coronavirus-2019/global-research-on-novel-coronavirus-2019-ncov/solidarity-clinical-trial-for-covid-19-treatments>. Accessed on September 08, 2020.
73. Wang Y, Zhang D, Du G, Du R, Zhao J, Jin Y, et al. Remdesivir in adults with severe COVID-19: a randomised, double-blind, placebo-controlled, multicentre trial. *Lancet*. 2020 May 16;395(10236):1569-78.[http://dx.doi.org/S0140-6736\(20\)31022-9](http://dx.doi.org/S0140-6736(20)31022-9)
74. Horby P, Lim WS, Emberson JR, Mafham M, Bell JL, Linsell L, et al. Dexamethasone in Hospitalized Patients with Covid-19 - Preliminary Report. *N Engl J Med*. 2020 Jul 17.<http://dx.doi.org/10.1056/NEJMoa2021436>.
75. Kaito D, Matsumura K, Yamamoto R. Hospital Preparedness for COVID-19: The Known and The Known Unknown. *Keio J Med*. 2020 Aug 22.<http://dx.doi.org/10.2302/kjm.2020-0011-OA>.
76. Emanuel EJ, Persad G, Upshur R, Thome B, Parker M, Glickman A, et al. Fair Allocation of Scarce Medical Resources in the Time of Covid-19. *N Engl J Med*. 2020 May 21;382(21):2049-55.<http://dx.doi.org/10.1056/NEJMs2005114>.
77. Noh JY, Song JY, Yoon JG, Seong H, Cheong HJ, Kim WJ. Safe hospital preparedness in the era of COVID-19: The Swiss cheese model. *Int J Infect Dis*. 2020 Jun 30;98:294-6.<http://dx.doi.org/10.1016/j.ijid.2020.06.094>.

78. Tartari E, Hopman J, Allegranzi B, Gao B, Widmer A, Cheng VC, et al. Perceived challenges of COVID-19 infection prevention and control preparedness: A multinational survey. *J Glob Antimicrob Resist*. 2020 Jul 11;22:779-81.<http://dx.doi.org/10.1016/j.jgar.2020.07.002>.
79. Choi GYS, Wan WTP, Chan AKM, Tong SK, Poon ST, Joynt GM. Preparedness for COVID-19: in situ simulation to enhance infection control systems in the intensive care unit. *Br J Anaesth*. 2020 Aug;125(2):e236-e9.<http://dx.doi.org/10.1016/j.bja.2020.04.001>.
80. Dharamsi A, Hayman K, Yi S, Chow R, Yee C, Gaylord E, et al. Enhancing departmental preparedness for COVID-19 using rapid-cycle in-situ simulation. *J Hosp Infect*. 2020 Aug;105(4):604-7.<http://dx.doi.org/10.1016/j.jhin.2020.06.020>.
81. Khan JA, Kiani MRB. Impact of multi-professional simulation-based training on perceptions of safety and preparedness among health workers caring for coronavirus disease 2019 patients in Pakistan. *J Educ Eval Health Prof*. 2020;17:19.<http://dx.doi.org/10.3352/jeehp.2020.17.19>.
82. Duan N, Gao W, Wang Q. Preparedness and disinfection of anesthetic equipment in COVID-19. *J Clin Anesth*. 2020 May 27;66:109924.<http://dx.doi.org/10.1016/j.jclinane.2020.109924>.
83. Felice C, Di Tanna GL, Zanus G, Grossi U. Impact of COVID-19 Outbreak on Healthcare Workers in Italy: Results from a National E-Survey. *J Community Health*. 2020 Aug;45(4):675-83.<http://dx.doi.org/10.1007/s10900-020-00845-5>.
84. Khubone T, Tlou B, Mashamba-Thompson TP. Electronic Health Information Systems to Improve Disease Diagnosis and Management at Point-of-Care in Low and Middle Income Countries: A Narrative Review. *Diagnostics (Basel)*. 2020 May 20;10(5).<http://dx.doi.org/10.3390/diagnostics10050327>.
85. Alwashmi MF. The Use of Digital Health in the Detection and Management of COVID-19. *Int J Environ Res Public Health*. 2020 Apr 23;17(8).<http://dx.doi.org/10.3390/ijerph17082906>.
86. Impouma B, Wolfe CM, Mboussou F, Farham B, Bukhari A, Flahault A, et al. Use of electronic tools for evidence-based preparedness and response to the COVID-19 pandemic in the WHO African region. *Lancet Digit Health*. 2020 Aug 7.[http://dx.doi.org/10.1016/S2589-7500\(20\)30170-9](http://dx.doi.org/10.1016/S2589-7500(20)30170-9).
87. Sarbadhikari S, Sarbadhikari SN. The global experience of digital health interventions in COVID-19 management. *Indian J Public Health*. 2020 Jun;64(Supplement):S117-S24.[http://dx.doi.org/10.4103/ijph.IJPH\\_457\\_20](http://dx.doi.org/10.4103/ijph.IJPH_457_20).
88. Wyatt JC. Hospital information management: the need for clinical leadership. *BMJ*. 1995 Jul 15;311(6998):175-8.<http://dx.doi.org/10.1136/bmj.311.6998.175>.
89. Hunt M, Pringle J, Christen M, Eckenwiler L, Schwartz L, Dave A. Ethics of emergent information and communication technology applications in humanitarian medical assistance. *Int Health*. 2016 Jul;8(4):239-45.<http://dx.doi.org/10.1093/inthealth/ihw028>.

90. Lee IK, Wang CC, Lin MC, Kung CT, Lan KC, Lee CT. Effective strategies to prevent coronavirus disease-2019 (COVID-19) outbreak in hospital. *J Hosp Infect.* 2020 May;105(1):102-3.<http://dx.doi.org/10.1016/j.jhin.2020.02.022>.
91. Lie SA, Wong LT, Chee M, Chong SY. Process-Oriented In Situ Simulation Is a Valuable Tool to Rapidly Ensure Operating Room Preparedness for COVID-19 Outbreak. *Simul Healthc.* 2020 Aug;15(4):225-33.<http://dx.doi.org/10.1097/SIH.0000000000000478>.
92. Ataguba OA, Ataguba JE. Social determinants of health: the role of effective communication in the COVID-19 pandemic in developing countries. *Glob Health Action.* 2020 Dec 31;13(1):1788263.<http://dx.doi.org/10.1080/16549716.2020.1788263>.
93. Epstein NE. Multidisciplinary in-hospital teams improve patient outcomes: A review. *Surg Neurol Int.* 2014;5(Suppl 7):S295-303.<http://dx.doi.org/10.4103/2152-7806.139612>.
94. Rubinelli S, Myers K, Rosenbaum M, Davis D. Implications of the current COVID-19 pandemic for communication in healthcare. *Patient Educ Couns.* 2020 Jun;103(6):1067-9.<http://dx.doi.org/10.1016/j.pec.2020.04.021>.
95. Center TH. Ethical Framework for Health Care Institutions & Guidelines for Institutional Ethics Services Responding to the Coronavirus Pandemic. 2020 [septemeber 10, 2020]; Available from: <https://www.thehastingscenter.org/ethicalframeworkcovid19/>.
96. Retsas S. Clinical trials and the COVID-19 pandemic. *Hell J Nucl Med.* 2020 Jan-Apr;23(1):4-5.<http://dx.doi.org/10.1967/s002449912014>.
97. Meagher KM, Cummins NW, Bharucha AE, Badley AD, Chlan LL, Wright RS. COVID-19 Ethics and Research. *Mayo Clin Proc.* 2020 Jun;95(6):1119-23.<http://dx.doi.org/10.1016/j.mayocp.2020.04.019>.



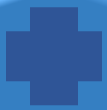

# ETHICS

Principles of clinical ethics + public health ethics= crisis standard ethics

## CLINICAL CARE

- Communication: 1. Reliable 2. Regular 3. Relevant 4. Empathetic 5. Digitization
- Training: & Education: 1. Adoptable 2. Simulation 3. Evidence based practice
- Research: formulate guidelines and protocols

## HOSPITAL INFORMATION MANAGEMENT

### INFECTION PREVENTION & CONTROL

1. PPE
2. Hand hygiene
3. Social distancing
4. Active Surveillance
5. Simulation exercise
6. Telemedicine
7. Virtual conference
8. Barrier nursing
9. Sterilization & decontamination
10. Reorganization of space
11. Minimize & channelize movement

### SUPPORT SERVICES

1. Maintenance
2. Hygiene sanitation
3. Transportation
4. Dead body management
5. Security

## INFECTION PREVENTION & CONTROL

- Resources management:
1. Redistribution, Redeployment & Recruitment of staff
  2. Restructuring, Reorganization & repurposing space
  3. Procurement, Recycle, Reuse and Repurposing supplies

## RESOURCES

### COMMUNICATION

### RESEARCH

TRIAGE of CARE: 1. Ethical consideration 2. Urgency Categorization 3. Service Reconfiguration 4. Resource optimization 5. Informed decision making 6. Clinical protocol

COVID CARE: 1. Testing 2. Isolation 3. Contact tracing 4. Quarantine

COVID UNIT: 1. Fever clinic 2. COVID-suspected 3. COVID-positive 4. COVID-ICU

### EDUCATION & TRAINING

## LEADERSHIP & INCIDENT COMMAND

Figure 2. Hospital preparedness and response framework for infection pandemic.
